# Supplementary material
Source: PubMed Central journal article supplement (PMC3282272)
Supplement: 97320630008026S1.pdf [file 97320630008026S1.pdf]

## Supplementary materials:

**Table 1:** Functional properties of human collagens in diseases:

| Collagen | Accession number | Collagen name                                   | Function                                                                                                       | Involvement in disease                                                                   |
|----------|------------------|-------------------------------------------------|----------------------------------------------------------------------------------------------------------------|------------------------------------------------------------------------------------------|
| Col 1    | P02452           | CO1A1_HUMAN<br>Collagen alpha-1(I)<br>chain     | Fibrillar forming collagen in bones<br>tendons ligaments                                                       | Mutation results in<br>Dwarfism,Ehlers-Danlos<br>syndrome and<br>Osteogenesis imperfecta |
| Col 2    | P02458           | CO2A1_HUMAN<br>Collagen alpha-1(II)<br>chain    | Normal embryonic development of<br>skeleton,linear growth                                                      | Cataract,deafness and mutation<br>causes stickler syndrome and<br>dwarfism               |
| Col 3    | P02461           | CO3A1_HUMAN<br>Collagen alpha-1(III)<br>chain   | Fibrillar forming collagen like type 1<br>collagen,formation of connective tissue                              | Mutation causes Aortic aneurysm,<br>Ehlers-Danlos syndrome                               |
| Col 4    | P02462           | CO4A1_HUMAN<br>Collagen alpha-1(IV)<br>chain    | Formation of 'chicken wire' meshwork<br>in glomerulus tissue ,thus involved in<br>filtering of urine in kidney | Alport syndrome                                                                          |
| Col 5    | P20908           | CO5A1_HUMAN<br>Collagen alpha-1(V)<br>chain     | Fibrillar forming,binds to<br>dna,fibrin,heparin and insulin                                                   | Ehlers-Danlos syndrome                                                                   |
| Col 6    | P12109           | CO6A1_HUMAN<br>Collagen alpha-1(VI)<br>chain    | Cell binding protein                                                                                           | Ulrich myopathy and Bethlem<br>myopathy                                                  |
| Col 7    | Q02388           | CO7A1_HUMAN<br>Collagen alpha-1(VII)<br>chain   | Basement membrane organization and<br>adherence                                                                | epidermolysis bullosa dystrophica                                                        |
| Col 8    | P27658           | CO8A1_HUMAN<br>Collagen alpha-1(VIII)<br>chain  | Proliferation of vscular smooth muscle<br>cells,maintains vessel wall integrity and<br>structure               | Posterior polymorphous corneal<br>dystrophy 2                                            |
| Col 9    | P20849           | CO9A1_HUMAN<br>Collagen alpha-1(IX)<br>chain    | Flexible hence connects type II collagen<br>to other cartilage components                                      | Osteoarthritis,muation may<br>result in epiphyseal dysplasia and<br>stickler syndrome    |
| Col 10   | Q03692           | COAA1_HUMAN<br>Collagen alpha-1(X)<br>chain     | -                                                                                                              | Schmid type metaphyseal<br>chondrodysplasia                                              |
| Col 11   | P12107           | COBA1_HUMAN<br>Collagen alpha-1(XI)<br>chain    | Important role in fibrillogenesis by<br>controlling growth of collagen II fibrils                              | Marshall syndrome and stickler<br>syndrome                                               |
| Col 12   | Q99715           | COCA1_HUMAN<br>Collagen alpha-1(XII)<br>chain   | Modifies surrounding matrix by<br>interaction with type I collagen                                             | N.D                                                                                      |
| Col 13   | Q5TAT6           | CODA1_HUMAN<br>Collagen alpha-1(XIII)<br>chain  | Cell-matrix and cell-cell interactions for<br>normal development                                               | -                                                                                        |
| Col 14   | Q05707           | COEA1_HUMAN<br>Collagen alpha-1(XIV)<br>chain   | Interacts with collagen<br>bundles,adhesion                                                                    | -                                                                                        |
| Col 15   | P39059           | COFA1_HUMAN<br>Collagen alpha-1(XV)<br>chain    | Stabilizes microvessels and muscle cells<br>in heart and skeletal muscle,inhibits<br>angiogenesis              | -                                                                                        |
| Col 16   | Q07092           | COGA1_HUMAN<br>Collagen alpha-1(XVI)<br>chain   | Induces integrin mediated<br>interactions:Cell spreading, attachment<br>and alteration of morphlogy of cells   | -                                                                                        |
| Col 17   | Q9UMD9           | COHA1_HUMAN<br>Collagen alpha-1(XVII)           | Role in maintaining integrity of<br>hemidesmosome, attachment of basal<br>keratinocytes basement membrane.     | -                                                                                        |
| Col 18   | P39060           | COIA1_HUMAN<br>Collagen alpha-1(XVIII)<br>chain | Determination of renal structure and<br>closure of renal tube,inhibits<br>angiogenesis                         | -                                                                                        |

|        |        |                                                   |                                                                                                               |   |
|--------|--------|---------------------------------------------------|---------------------------------------------------------------------------------------------------------------|---|
| Col 19 | Q14993 | COJA1_HUMAN<br>Collagen alpha-1(XIX)<br>chain     | Esophagus development,organization<br>of pericellular matrix                                                  | - |
| Col 20 | Q9P218 | COKA1_HUMAN<br>Collagen alpha-1(XX)<br>chain      | -                                                                                                             | - |
| Col 21 | Q96P44 | COLA1_HUMAN<br>Collagen alpha-1(XXI)<br>chain     | -                                                                                                             | - |
| Col 22 | Q8NFW1 | COMA1_HUMAN<br>Collagen alpha-1(XXII)<br>chain    | Acts as a cell adhesion ligand for skin<br>epithelial cells and fibroblasts                                   | - |
| Col 23 | Q86Y22 | CONA1_HUMAN<br>Collagen alpha-1(XXIII)<br>chain   | -                                                                                                             | - |
| Col 24 | Q17RW2 | COOA1_HUMAN<br>Collagen alpha-1(XXIV)<br>chain    | Regulation of type I collagen<br>fibrillogenesis at specific anatomical<br>locations during fetal development | - |
| Col 25 | Q9BXS0 | COPA1_HUMAN<br>Collagen alpha-1(XXV)<br>chain     | Binds heparin,assembles amyloid fibrils<br>into protease resisitant aggregates                                | - |
| Col 26 | Q96A83 | EMID2_HUMAN<br>Collagen alpha-1(XXVI)<br>chain    | -                                                                                                             | - |
| Col 27 | Q8IZC6 | CORA1_HUMAN<br>Collagen alpha-<br>1(XXVII) chain  | calcification of cartilage and the<br>transition of cartilage to bone                                         | - |
| Col 28 | Q2UY09 | COSA1_HUMAN<br>Collagen alpha-<br>1(XXVIII) chain | May act as a cell binding protein                                                                             | - |

\*N.D. - Not defined

**Table 2:** Amino acid composition of human alpha-1 collagens (in %) :

| Collagen | Ala | Arg | Asn | Asp | Cys | Gln | Glu | Gly  | His | Ile | Leu  | Lys | Met | Phe | Pro  | Ser  | Thr | Trp | Tyr | Val |
|----------|-----|-----|-----|-----|-----|-----|-----|------|-----|-----|------|-----|-----|-----|------|------|-----|-----|-----|-----|
| Col 1    | 9.5 | 4.8 | 1.2 | 4.5 | 1.2 | 3.3 | 5.1 | 26.7 | 0.6 | 1.6 | 3.3  | 3.9 | 0.9 | 1.8 | 19   | 4.1  | 3.1 | 0.4 | 0.9 | 3.2 |
| Col 2    | 9   | 4.8 | 2.2 | 4.2 | 1.3 | 4   | 5.3 | 27.3 | 0.5 | 2.3 | 3.8  | 4.5 | 1.1 | 1.7 | 18.2 | 3.2  | 3.0 | 0.5 | 0.7 | 2.6 |
| Col 3    | 7.8 | 4.1 | 2.8 | 3.8 | 1.5 | 2.9 | 5.0 | 28.2 | 1.0 | 2.5 | 3.3  | 4.2 | 1.2 | 1.6 | 19.2 | 5.0  | 2.1 | 0.5 | 0.1 | 2.5 |
| Col 4    | 3.5 | 2.7 | 1.0 | 3.5 | 1.2 | 4.4 | 4.2 | 28.6 | 1.0 | 3.5 | 5.5  | 5.6 | 1.9 | 2.8 | 19.4 | 4.3  | 2.6 | 0.4 | 1.1 | 3.1 |
| Col 5    | 5   | 3.8 | 1.8 | 5.7 | 0.7 | 4.0 | 6.5 | 23.3 | 0.9 | 2.8 | 5.3  | 5.3 | 1.3 | 2.1 | 18.2 | 3.8  | 3.8 | 0.4 | 2.2 | 2.9 |
| Col 6    | 7.5 | 5.8 | 2.7 | 6.9 | 1.9 | 4.1 | 6.6 | 15.2 | 1.4 | 4.1 | 6.9  | 5.3 | 1.1 | 3.2 | 8.7  | 5.3  | 4   | 0.4 | 2.7 | 6.3 |
| Col 7    | 6.6 | 7.4 | 0.9 | 4.9 | 0.6 | 3.6 | 6.4 | 21.3 | 1.0 | 1.9 | 7.2  | 3.2 | 0.6 | 1.3 | 14.5 | 5.6  | 4.5 | 0.6 | 1.2 | 6.8 |
| Col 8    | 4.4 | 1.7 | 1.1 | 1.5 | 0.3 | 5.1 | 3.5 | 25.9 | 1.5 | 4.4 | 7.1  | 6.3 | 3.1 | 2.3 | 22.4 | 1.5  | 1.1 | 0.1 | 3.0 | 4.0 |
| Col 9    | 5.1 | 5.9 | 2.2 | 4.2 | 1.2 | 4.2 | 5.1 | 23.6 | 0.9 | 3.9 | 6.2  | 4.6 | 1.3 | 2.4 | 16.6 | 4.6  | 2.8 | 0.7 | 0.7 | 4.0 |
| Col 10   | 5.3 | 2.8 | 2.1 | 1.8 | 0.1 | 3.4 | 3.2 | 25.7 | 1.5 | 4   | 5.1  | 5.1 | 1.6 | 2.2 | 21.3 | 4    | 3.5 | 0.3 | 3.1 | 3.8 |
| Col 11   | 5.4 | 3.8 | 2.0 | 5.5 | 0.6 | 4.5 | 6.8 | 23.4 | 0.9 | 3.1 | 4.4  | 5.9 | 1.3 | 2.6 | 15.9 | 4    | 3.8 | 0.5 | 2.0 | 3.5 |
| Col 12   | 5.2 | 5.1 | 3.9 | 5.6 | 0.7 | 3.4 | 6.3 | 9.2  | 1.0 | 4.8 | 6.6  | 5.1 | 1.5 | 3.0 | 8.6  | 7.9  | 8.7 | 1.0 | 3.7 | 8.8 |
| Col 13   | 6.8 | 4.9 | 1.5 | 3.2 | 1.1 | 3.9 | 6.1 | 25.7 | 1.5 | 2.6 | 7.4  | 6.4 | 1.8 | 0.7 | 17.4 | 3.3  | 2.4 | 0.3 | 0.4 | 2.4 |
| Col 14   | 5.2 | 4.1 | 3.2 | 5.2 | 1.1 | 4.0 | 6.6 | 10.9 | 1.6 | 5.5 | 7.2  | 4.8 | 1.8 | 3.3 | 8.7  | 7.4  | 7.6 | 1.0 | 3.0 | 7.9 |
| Col 15   | 7.8 | 3.4 | 2.7 | 4.2 | 0.7 | 2.9 | 7.0 | 15.9 | 1.8 | 3.9 | 8.1  | 3.7 | 2.2 | 3.1 | 13.8 | 7.1  | 5.3 | 0.7 | 1.0 | 4.7 |
| Col 16   | 5.3 | 3.9 | 1.4 | 3.2 | 2   | 4.9 | 5.7 | 24.4 | 1.2 | 2.6 | 7.1  | 5.4 | 1.6 | 1.9 | 17.6 | 4.7  | 2.7 | 0.5 | 0.8 | 3.9 |
| Col 17   | 5.7 | 4.5 | 2.1 | 3.6 | 0.5 | 3.2 | 4.2 | 18.8 | 1.5 | 2.7 | 8.4  | 4   | 2.2 | 1.7 | 13.6 | 11.9 | 5.6 | 0.7 | 2.4 | 3.9 |
| Col 18   | 8   | 5.2 | 1.5 | 4.2 | 1.3 | 3.8 | 5.1 | 17.2 | 2.1 | 1.7 | 6.2  | 2.4 | 0.9 | 3.2 | 16.9 | 6.9  | 3.9 | 1.2 | 1.1 | 5.0 |
| Col 19   | 4.6 | 4.1 | 2.6 | 4.3 | 1.2 | 4   | 5.9 | 22.9 | 1.4 | 5   | 10.7 | 6.7 | 1.6 | 2.2 | 15.1 | 4.6  | 2.6 | 0.6 | 1.4 | 2.9 |
| Col 20   | 8.9 | 6.6 | 0.9 | 3.6 | 1   | 4.4 | 5.7 | 11.5 | 2.2 | 1.8 | 6.9  | 3   | 1.1 | 2.7 | 10   | 8.3  | 6.7 | 1.3 | 2.0 | 7.6 |
| Col 21   | 4.2 | 4   | 2.7 | 5   | 1.5 | 5.3 | 5.2 | 18.9 | 1.1 | 5.6 | 6.2  | 7.1 | 1.3 | 3.0 | 11.1 | 5.2  | 3.6 | 0.4 | 2.3 | 5.5 |
| Col 22   | 5.8 | 5.2 | 1.5 | 4.3 | 1.1 | 3.8 | 6.4 | 24.4 | 1.2 | 2.8 | 7.4  | 5.4 | 1.2 | 2.1 | 16.4 | 4.1  | 2.6 | 0.4 | 1.0 | 4.3 |
| Col 23   | 8   | 3.9 | 0.4 | 5.4 | 1.1 | 3.1 | 6.7 | 27.2 | 0.6 | 1.5 | 7.5  | 6.5 | 0.9 | 0.4 | 17.2 | 3.1  | 1.5 | 0.4 | 0.4 | 2.8 |
| Col 24   | 3.4 | 4.3 | 3.3 | 3.5 | 0.9 | 5.3 | 6   | 21.3 | 2.2 | 5.1 | 6.3  | 6.1 | 1.4 | 2.5 | 12.1 | 5.3  | 4.6 | 0.3 | 1.8 | 4.0 |
| Col 25   | 5   | 6.3 | 1.4 | 4.3 | 1.1 | 4.9 | 6.9 | 25.5 | 1.5 | 3.1 | 8.8  | 7.6 | 2.6 | 0.8 | 16.5 | 3.1  | 2.4 | 0.2 | 0.6 | 2.0 |
| Col 26   | 8.6 | 5.4 | 2.3 | 3.6 | 2.9 | 4.1 | 5.4 | 14.7 | 1.6 | 1.6 | 7.2  | 2.7 | 1.4 | 0.9 | 15.4 | 6.6  | 5.2 | 1.1 | 1.8 | 4.8 |
| Col 27   | 5.9 | 3.6 | 1.1 | 3.7 | 0.8 | 5.2 | 3.6 | 21.3 | 1.7 | 2.4 | 5.9  | 5.1 | 2   | 2.6 | 16.3 | 5.7  | 4.7 | 0.5 | 0.9 | 3.8 |
| Col 28   | 3.7 | 3.6 | 2.4 | 5.6 | 1.3 | 5.2 | 6.5 | 18.8 | 0.6 | 5.4 | 5.9  | 8.1 | 1.2 | 3.4 | 11.5 | 6.1  | 4   | 0.4 | 1.6 | 4.7 |

\*Col- Collagens

**Table 3(a):** Physico-chemical parameters of human alpha-1 collagens:

| Collagen | No. of amino acids | Molecular weight | pI   | '-' charged residue | '+' charged residue | Extinction Coefficient | Instability index | Aliphatic index | GRAVY  |
|----------|--------------------|------------------|------|---------------------|---------------------|------------------------|-------------------|-----------------|--------|
| Col 1    | 1464               | 138941.5         | 5.6  | 141                 | 128                 | 53495                  | 30.43             | 37.98           | -0.788 |
| Col 2    | 1487               | 141785.3         | 6.58 | 141                 | 139                 | 54525                  | 25.21             | 40.03           | -0.803 |
| Col 3    | 1466               | 138564.2         | 6.21 | 129                 | 122                 | 62225                  | 30.18             | 37.31           | -0.797 |
| Col 4    | 1669               | 1606147.7        | 8.55 | 128                 | 138                 | 61070                  | 32.04             | 47.39           | -0.621 |
| Col 5    | 1838               | 183559.8         | 4.94 | 225                 | 168                 | 98850                  | 33.09             | 45.35           | -0.873 |
| Col 6    | 1028               | 108529.4         | 5.26 | 139                 | 114                 | 64970                  | 28.52             | 68.7            | -0.525 |
| Col 7    | 2944               | 295219.6         | 5.95 | 332                 | 310                 | 159140                 | 32.07             | 61.86           | -0.625 |
| Col 8    | 744                | 73364            | 9.62 | 37                  | 60                  | 38405                  | 36.06             | 61.21           | -0.434 |
| Col 9    | 921                | 91869.2          | 8.94 | 86                  | 96                  | 42565                  | 32.61             | 56.13           | -0.658 |
| Col 10   | 680                | 66157.9          | 9.68 | 34                  | 54                  | 42290                  | 25.95             | 51.94           | -0.556 |
| Col 11   | 1806               | 181064.8         | 5.06 | 222                 | 174                 | 103765                 | 30.81             | 44.91           | -0.859 |
| Col 12   | 3063               | 333146.7         | 5.38 | 366                 | 313                 | 334620                 | 32.90             | 75.45           | -0.427 |
| Col 13   | 717                | 69949.9          | 9.27 | 67                  | 81                  | 15970                  | 31.44             | 52.87           | -0.765 |
| Col 14   | 1796               | 193515.4         | 5.16 | 211                 | 160                 | 179095                 | 37.57             | 77.67           | -0.326 |
| Col 15   | 1388               | 141720.1         | 4.9  | 155                 | 95                  | 76485                  | 40.19             | 68              | -0.377 |
| Col 16   | 1604               | 157751.3         | 8.14 | 144                 | 150                 | 65370                  | 35.88             | 50.73           | -0.671 |
| Col 17   | 1497               | 150419.3         | 8.89 | 117                 | 128                 | 109015                 | 45.25             | 55.47           | -0.573 |
| Col 18   | 1754               | 178187.6         | 5.67 | 164                 | 133                 | 145185                 | 48.57             | 61.72           | -0.467 |
| Col 19   | 1142               | 115220.7         | 8.57 | 116                 | 124                 | 63215                  | 30.68             | 56.68           | -0.708 |
| Col 20   | 1284               | 135830           | 8.27 | 119                 | 123                 | 132990                 | 45.18             | 79.61           | -0.261 |
| Col 21   | 957                | 99368.5          | 8.57 | 98                  | 106                 | 55655                  | 33.28             | 69.14           | -0.517 |
| Col 22   | 1626               | 161145.3         | 6.88 | 174                 | 172                 | 57965                  | 34                | 53.28           | -0.715 |
| Col 23   | 540                | 51943.9          | 6.88 | 65                  | 65                  | 14355                  | 30.81             | 50.69           | -0.829 |
| Col 24   | 1714               | 175496.3         | 8.46 | 162                 | 170                 | 73075                  | 28.32             | 64.21           | -0.622 |
| Col 25   | 654                | 64770.7          | 8.6  | 73                  | 78                  | 11835                  | 24.85             | 47.19           | -0.919 |
| Col 26   | 441                | 45381.1          | 7.02 | 40                  | 40                  | 40170                  | 46.77             | 63.11           | -0.523 |
| Col 27   | 1860               | 186892.3         | 9.83 | 136                 | 196                 | 81205                  | 37.62             | 54.15           | -0.637 |
| Col 28   | 1125               | 116657.1         | 6.1  | 136                 | 131                 | 55195                  | 24.18             | 61.42           | -0.66  |

\*Col- Collagens

**Table 3(b):** Physico-chemical properties of human alpha-1 collagens

| Collagen | No. of codons | Bulkiness | Polarity | Refractivity | Recognit ion factors | Hydrophobicity | Trans-membrane tendency | % buried residues | % accessible residues | Average area buried | Average flexibility |
|----------|---------------|-----------|----------|--------------|----------------------|----------------|-------------------------|-------------------|-----------------------|---------------------|---------------------|
| Col1     | 3.889         | 14.3645   | 17.2635  | 14.4125      | 87.5                 | -0.2835        | -0.6295                 | 6.528             | 5.622                 | 118.5835            | 0.4505              |
| Col2     | 3.611         | 14.535    | 17.012   | 14.417       | 89.722               | 0.05           | -0.434                  | 6.9445            | 5.9665                | 116.9055            | 0.452               |
| Col3     | 3.889         | 13.688    | 14.3925  | 14.1385      | 88.889               | -0.222         | -0.3985                 | 7.3885            | 5.65                  | 116.239             | 0.4505              |
| Col4     | 3.722         | 13.466    | 16.9645  | 14.739       | 89.6115              | 0.0115         | -0.564                  | 6.561             | 5.9555                | 120.7055            | 0.4445              |
| Col5     | 3.889         | 13.905    | 16.8185  | 15.437       | 88.5555              | -0.089         | -0.429                  | 6.1335            | 5.9                   | 117.989             | 0.452               |
| Col6     | 3.5555        | 13.866    | 17.659   | 16.544       | 88.7225              | -0.0225        | -0.5395                 | 5.95              | 5.672                 | 116.35              | 0.453               |
| Col7     | 3.7775        | 14.1405   | 17.502   | 14.787       | 90.611               | -0.139         | -0.6305                 | 6.767             | 5.9445                | 118.028             | 0.4485              |
| Col8     | 3.722         | 13.8405   | 14.092   | 15.435       | 88.389               | -0.1835        | -0.3875                 | 6.5835            | 5.8725                | 119.7725            | 0.4455              |
| Col9     | 3.5555        | 14.563    | 17.537   | 16.071       | 87.5555              | -0.0055        | -0.3405                 | 6                 | 5.422                 | 122.5835            | 0.444               |
| Col10    | 3.722         | 14.577    | 12.346   | 14.2365      | 88.5555              | -0.2665        | -0.3025                 | 6.25              | 5.661                 | 119.7725            | 0.4555              |
| Col11    | 3.4445        | 13.735    | 17.296   | 16.398       | 89                   | -0.55          | -0.6195                 | 6.611             | 6.0665                | 122.972             | 0.45                |
| Col12    | 3.722         | 14.226    | 16.8455  | 15.1145      | 90                   | -0.078         | -0.5105                 | 6.9225            | 5.9335                | 121.2225            | 0.454               |
| Col13    | 3.833         | 13.779    | 20.1465  | 15.135       | 80.0555              | -0.2335        | -0.55                   | 6.4615            | 5.9835                | 118.511             | 0.4495              |
| Col14    | 3.5555        | 14.611    | 19.96    | 15.7995      | 89.3335              | -0.283         | -0.843                  | 5.622             | 5.7055                | 122.35              | 0.4495              |
| Col15    | 3.72205       | 13.5155   | 16.584   | 15.1545      | 87.444               | -0.033         | -0.513                  | 6.861             | 5.4945                | 119.6555            | 0.443               |
| Col16    | 3.5           | 14.316    | 17.226   | 15.108       | 88.2775              | 0.1775         | -0.357                  | 6.1055            | 5.789                 | 120.672             | 0.448               |
| Col17    | 3.889         | 12.439    | 17.232   | 15.038       | 92.333               | -0.1165        | -0.3895                 | 7.1615            | 6.122                 | 116.522             | 0.454               |
| Col18    | 3.889         | 13.5065   | 17.062   | 14.587       | 89.444               | 0.3335         | -0.3765                 | 6.3385            | 5.5275                | 122.828             | 0.4335              |
| Col19    | 3.5           | 14.179    | 17.4405  | 16.2065      | 87.4445              | -0.622         | -0.4485                 | 6.311             | 5.7165                | 126.9225            | 0.4445              |
| Col20    | 3.7775        | 14.161    | 19.7095  | 15.07        | 90.6665              | -0.3335        | -0.5825                 | 6.828             | 5.9115                | 124.783             | 0.4425              |
| Col21    | 3.5555        | 14.8025   | 16.9925  | 15.4085      | 88.0555              | -0.3335        | -0.3235                 | 6.256             | 5.811                 | 123.1165            | 0.439               |
| Col22    | 3.722         | 14.055    | 17.253   | 15.4765      | 87.056               | 0.222          | -0.32                   | 6.4555            | 5.911                 | 124.278             | 0.4435              |
| Col23    | 3.9445        | 11.8145   | 19.881   | 11.6245      | 87.222               | -0.017         | -0.5535                 | 5.63385           | 6                     | 109.889             | 0.4535              |
| Col24    | 3.722         | 14.5095   | 17.514   | 15.4565      | 89.1115              | -0.2555        | -0.472                  | 7.1               | 5.8225                | 119.835             | 0.4395              |
| Col25    | 3.7225        | 13.5035   | 17.207   | 13.0145      | 87.3885              | 0.011          | -0.534                  | 7.289             | 5.6555                | 113.683             | 0.4545              |
| Col26    | 3.167         | 13.7255   | 14.878   | 15.4075      | 87.8885              | -0.3055        | -0.593                  | 6.767             | 5.2225                | 116.1885            | 0.4455              |
| Col27    | 3.611         | 13.9525   | 17.331   | 14.9185      | 90.889               | -0.111         | -0.3675                 | 6.55              | 6.011                 | 119.067             | 0.445               |
| Col28    | 3.5555        | 14.7145   | 19.934   | 16.194       | 88.3335              | -0.183         | -0.5865                 | 6.022             | 5.7165                | 127.9725            | 0.446               |

\*Col- Collagens

**Table 4:** Secondary structural features of human alpha-1 collagens (in %):

| Collagen | $\alpha$ helix | $3_{10}$ helix | Pi helix | $\beta$ bridge | Extended strand | $\beta$ turn | Bend region | Random coil | Ambiguous states | Other states |
|----------|----------------|----------------|----------|----------------|-----------------|--------------|-------------|-------------|------------------|--------------|
| Col1     | 4.37           | 0              | 0        | 0              | 8.13            | 4.3          | 0           | 83.2        | 0                | 0            |
| Col2     | 6.27           | 0              | 0        | 0              | 7.2             | 4.57         | 0           | 81.51       | 0                | 0            |
| Col3     | 4.5            | 0              | 0        | 0              | 7.44            | 4.71         | 0           | 83.36       | 0                | 0            |
| Col4     | 4.73           | 0              | 0        | 0              | 7.61            | 5.69         | 0           | 81.97       | 0                | 0            |
| Col5     | 7.94           | 0              | 0        | 0              | 11.53           | 4.9          | 0           | 75.63       | 0                | 0            |
| Col6     | 24.22          | 0              | 0        | 0              | 15.86           | 5.25         | 0           | 54.67       | 0                | 0            |
| Col7     | 9.51           | 0              | 0        | 0              | 15.9            | 6.15         | 0           | 68.44       | 0                | 0            |
| Col8     | 5.65           | 0              | 0        | 0              | 10.89           | 9.41         | 0           | 74.06       | 0                | 0            |
| Col9     | 9.45           | 0              | 0        | 0              | 7.17            | 3.37         | 0           | 80.02       | 0                | 0            |
| Col10    | 3.97           | 0              | 0        | 0              | 12.35           | 5            | 0           | 78.68       | 0                | 0            |
| Col11    | 8.36           | 0              | 0        | 0              | 12.02           | 5.59         | 0           | 74.03       | 0                | 0            |
| Col12    | 13.12          | 0              | 0        | 0              | 25.56           | 4.9          | 0           | 56.42       | 0                | 0            |
| Col13    | 14.09          | 0              | 0        | 0              | 4.6             | 4.46         | 0           | 76.85       | 0                | 0            |
| Col14    | 17.76          | 0              | 0        | 0              | 24.44           | 5.57         | 0           | 52.23       | 0                | 0            |
| Col15    | 18.44          | 0              | 0        | 0              | 16.71           | 6.77         | 0           | 58.07       | 0                | 0            |
| Col16    | 7.79           | 0              | 0        | 0              | 10.1            | 5.99         | 0           | 76.12       | 0                | 0            |
| Col17    | 19.91          | 0              | 0        | 0              | 11.89           | 6.95         | 0           | 61.26       | 0                | 0            |
| Col18    | 17.56          | 0              | 0        | 0              | 12.43           | 6.9          | 0           | 63.11       | 0                | 0            |
| Col19    | 13.57          | 0              | 0        | 0              | 9.54            | 6.04         | 0           | 70.84       | 0                | 0            |
| Col20    | 18.15          | 0              | 0        | 0              | 21.65           | 5.69         | 0           | 54.52       | 0                | 0            |
| Col21    | 15.26          | 0              | 0        | 0              | 12.43           | 4.7          | 0           | 67.61       | 0                | 0            |
| Col22    | 11.38          | 0              | 0        | 0              | 10.7            | 7.56         | 0           | 70.36       | 0                | 0            |
| Col23    | 13.7           | 0              | 0        | 0              | 0.56            | 1.3          | 0           | 84.44       | 0                | 0            |
| Col24    | 7.41           | 0              | 0        | 0              | 9.33            | 2.92         | 0           | 80.34       | 0                | 0            |
| Col25    | 12.69          | 0              | 0        | 0              | 4.43            | 3.82         | 0           | 79.05       | 0                | 0            |
| Col26    | 24.94          | 0              | 0        | 0              | 11.11           | 5.9          | 0           | 58.05       | 0                | 0            |
| Col27    | 9.46           | 0              | 0        | 0              | 11.88           | 5.86         | 0           | 72.8        | 0                | 0            |
| Col28    | 19.29          | 0              | 0        | 0              | 10.58           | 4.18         | 0           | 65.96       | 0                | 0            |

\*Col- Collagen

**Table 5:** Motifs in human alpha-1 collagens:

| Collagen | Motif found   | Motif ID | Description                                            | Start | End  | Match Status                       | Significance |
|----------|---------------|----------|--------------------------------------------------------|-------|------|------------------------------------|--------------|
| Col1     | VWFC_1        | PS01208  | VWFC domain signature                                  | 58    | 95   | Strong match; not a false positive |              |
| Col2     | VWFC_1        | PS01208  | VWFC domain signature                                  | 52    | 89   | Strong match; not a false positive |              |
| Col3     | VWFC_1        | PS01208  | VWFC domain signature                                  | 50    | 88   | Strong match; not a false positive |              |
| Col7     | BPTI_KUNITZ_1 | PS00280  | Pancreatic trypsin inhibitor signature (Kunitz) family | 2907  | 2925 | Strong match; not a false positive |              |
| Col28    | BPTI_KUNITZ_1 | PS00280  | Pancreatic trypsin inhibitor signature (Kunitz) family | 1100  | 1118 | Strong match; not a false positive |              |

\*VWFC: von Willebrand factor (VWF) type C repeat

\*\*No motifs were found in remaining human alpha-1 collagen sequences

\*\*\* Col- Collagen
